# Supplementary material for: Comparative analysis of fecal DNA viromes in Large-billed crows and Northern ravens reveals diverse viral profiles
Source: PeerJ. 2025 Oct 15;13:e20170. doi: 10.7717/peerj.20170 (PMC12535234; doi:10.7717/peerj.20170)
Supplement: Supplemental Information 1 — Used to describe the quality of sequencing data, including sample ID, total number of reads, total base count, number of reads containing “N” and their percentage, as well as the percentage distribution of A, T, C, G, and N bases, error rate, Q20%, Q30%, and GC content. [file peerj-13-20170-s001.xlsx]

## Sheet: Sheet1
Table S1:Raw data after sequencing
SampleID	Total_Reads	Total_Bases	Total_Reads_with_Ns	N_Reads%	A%	T%	C%	G%	N%	Error%	Q20%	Q30%	GC%
DZ1	75013134	11251970100	344876	0.46	24.5	24.24	25.46	25.8	0	0.023	98.44	97.07	51.26
DZ2	78301488	11745223200	553662	0.71	28.43	28.16	21.51	21.9	0.01	0.0228	98.56	97.25	43.41
DZ3	69488778	10423316700	316660	0.46	26.22	25.93	23.77	24.07	0	0.023	98.45	97.06	47.84
DZ4	65964120	9894618000	884686	1.34	28.22	28.19	21.73	21.85	0.01	0.0252	97.45	95.23	43.58
DY1	74639598	11195939700	35186	0.05	26.07	25.7	23.77	24.46	0	0.0274	96.92	92.05	48.23
DY2	67537706	10130655900	34964	0.05	30.61	30.22	19.1	20.06	0	0.0283	96.51	91.4	39.17
DY3	71938782	10790817300	57221	0.08	28.33	27.99	21.55	22.13	0	0.027	97.13	92.45	43.68
