# Supplementary material for: Comparative analysis of fecal DNA viromes in Large-billed crows and Northern ravens reveals diverse viral profiles
Source: PeerJ. 2025 Oct 15;13:e20170. doi: 10.7717/peerj.20170 (PMC12535234; doi:10.7717/peerj.20170)
Supplement: Supplemental Information 2 — The data after quality control, including total number of reads, total base count, number of reads containing “N” and their percentage, base composition (A%, T%, C%, G%, N%), sequencing error rate, proportion of high-quality bases (Q20%, Q30%), and GC content. [file peerj-13-20170-s002.xlsx]

## Sheet: Sheet1
Table S2: Clean data after quality control
SampleID	Total_Reads	Total_Bases	Total_Reads_with_Ns	N_Reads%	A%	T%	C%	G%	N%	Error%	Q20%	Q30%	GC%
DZ1	73059684	10934794282	333183	0.46	24.54	24.28	25.45	25.72	0	0.0217	99.09	98.29	51.17
DZ2	76339760	11425108173	532186	0.7	28.5	28.21	21.51	21.78	0.01	0.0216	99.15	98.37	43.28
DZ3	67705954	10135402035	305671	0.45	26.27	25.98	23.75	23.99	0	0.0217	99.08	98.25	47.75
DZ4	62378442	9299390014	823418	1.32	28.57	28.46	21.48	21.48	0.01	0.0221	98.85	97.95	42.96
DY1	71552748	10669973629	28646	0.04	26.04	25.75	23.85	24.36	0	0.0254	98	93.55	48.22
DY2	64182768	9549516702	27817	0.04	30.61	30.33	19.15	19.91	0	0.0256	97.94	93.33	39.06
DY3	69219760	10328933958	38163	0.06	28.32	28.04	21.61	22.03	0	0.0251	98.12	93.85	43.64
