# Supplementary material for: Comparative analysis of fecal DNA viromes in Large-billed crows and Northern ravens reveals diverse viral profiles
Source: PeerJ. 2025 Oct 15;13:e20170. doi: 10.7717/peerj.20170 (PMC12535234; doi:10.7717/peerj.20170)
Supplement: Supplemental Information 3 — The statistical information of sequencing data after host screening, including sample ID (SampleID), total input paired reads (TotalInputReadsPair), host-derived paired reads (host), non-host derived paired reads (nohostReadsPair), and the proportion of non-host paired reads relative to total input paired reads (nohostrate%). [file peerj-13-20170-s003.xlsx]

## Sheet: Sheet1
Table S3:Clean data after rmove host
SampleID	TotalInputReadsPair	host	nohostReadsPair	nohostrate(%)
DZ1	36529842	7847760	28682084	78.51
DZ2	38169880	223822	37946060	99.41
DZ3	33852977	6735725	27117254	80.1
DZ4	31189221	22124	31167099	99.92
DY1	35776374	2104654	33671722	94.11
DY2	32091384	2719441	29371945	91.52
DY3	34609880	3647222	30962660	89.46
