# Supplementary material for: Comparative analysis of fecal DNA viromes in Large-billed crows and Northern ravens reveals diverse viral profiles
Source: PeerJ. 2025 Oct 15;13:e20170. doi: 10.7717/peerj.20170 (PMC12535234; doi:10.7717/peerj.20170)
Supplement: Supplemental Information 4 — Statistical information of the assembled sequences, including sample ID (SampleID), number of sequences (Number), total sequence length (Length), N50 and N90 metrics (N50, N90), maximum sequence length (Max), and minimum sequence length (Min). [file peerj-13-20170-s004.xlsx]

## Sheet: Sheet1
Table S4: Data after assembling the reads with host sequences removed
SampleID	Number	Length	N50	N90	Max	Min
DY1	61216	103388786	2390	670	408008	500
DY2	17733	22317894	1389	608	124027	500
DY3	47204	69162520	1747	635	123351	500
DZ1	56096	86820297	2053	645	375520	500
DZ2	19145	27545098	1770	622	76793	500
DZ3	127888	177429038	1730	610	338920	500
DZ4	20375	28383736	1758	617	99586	500
