# Supplementary material for: Comparative analysis of fecal DNA viromes in Large-billed crows and Northern ravens reveals diverse viral profiles
Source: PeerJ. 2025 Oct 15;13:e20170. doi: 10.7717/peerj.20170 (PMC12535234; doi:10.7717/peerj.20170)
Supplement: Supplemental Information 5 — The number of candidate viruses identified using different software. [file peerj-13-20170-s005.xlsx]

## Sheet: Sheet1
Table S5: Number of viral candidate sequences identified using IMG, deepVirFinder, VirSorter, and Vibrant
Methods	DY1	DY2	DY3	DZ1	DZ2	DZ3	DZ4
IMG	307	106	159	319	28	144	137
deepVirFinder	4803	807	2877	4012	1347	11650	1631
virsorter	5065	801	2967	4911	1428	12441	2182
vibrant	3312	504	2094	3338	1019	8769	1410
