# Supplementary material for: Comparative analysis of fecal DNA viromes in Large-billed crows and Northern ravens reveals diverse viral profiles
Source: PeerJ. 2025 Oct 15;13:e20170. doi: 10.7717/peerj.20170 (PMC12535234; doi:10.7717/peerj.20170)
Supplement: Supplemental Information 6 — The detection results of different types of antibiotic resistance genes. [file peerj-13-20170-s006.xlsx]

## Sheet: Sheet1
Table S6:Data on the detection results of antibiotic resistance genes in the Large-billed Crow group and the Common Raven group
Type	Subtype	DY	DZ
rifamycin	Bado_rpoB_RIF	10.968	0.126
trimethoprim	DfrA39	10.093	0
beta_lactam	Klebsiella pneumoniae OmpK37	3.838	0.153
multidrug	MuxC	3.564	0.576
multidrug	OpmH	1.645	0.265
multidrug	Other_major_facilitator_superfamily_transporter	5.188	5.755
multidrug	ParR	2.192	0.172
multidrug	ParS	1.313	0.12
aminocoumarin	Streptomyces rishiriensis parY mutant conferring resistance to aminocoumarin	3.454	4.49
quinolone	arlR	0	0.113
bacitracin	bcrA	10.087	0.724
trimethoprim	dfrA12	0	0.092
trimethoprim	dfrA20	0.427	0
trimethoprim	dfrA26	1.139	0.02
trimethoprim	dfrA35	0.339	0
trimethoprim	dfrA8	0	0.334
trimethoprim	dfrA9	0.545	0
trimethoprim	dfrB1	0.863	0.473
trimethoprim	dfrB2	0	1.013
trimethoprim	dfrB3	3.408	0.053
trimethoprim	dfrB4	0	1.215
trimethoprim	dfrB6	0	0.413
trimethoprim	dfrC	0	0.2
trimethoprim	dfrK	13.804	0
multidrug	emrA	1.076	0.05
multidrug	emrB	1.535	0.101
multidrug	emrD	3.279	0.11
MLS	lnu(C)	2.418	1.711
MLS	macB	22.174	24.992
multidrug	marA	0	3.354
multidrug	mtrA	1.569	0.178
mupirocin	mupB	2.025	0.335
novobiocin	novA	1.155	0.238
MLS	ole(C)	3.666	7.807
polymyxin	pmrF	22.557	164.493
multidrug	rsmA	2.435	0.991
tetracycline	tet(W)	3.313	0.406
tetracycline	tetA(48)	2.501	0.181
tetracycline	tetB(P)	7.446	2.57
vancomycin	vanHA	4.201	0.2
vancomycin	vanRF	6.882	9.221
vancomycin	vanTE	4.099	0
vancomycin	vanUG	0	0.343
vancomycin	vanYB	0	1.155
MLS	vat(E)	0	0.506
